# Supplementary material
Source: publisher figshare collection journal article supplement (https://geolsoc.figshare.com/ndownloader/files/31096434)
Supplement: Supplementary file 1 [file 31096434]

## Sheet: Chuq_input_w_Garzione_Roperch
Interval top depth (km)	Interval bottom depth (km)	Interval top age (Ma)	Interval Bottom age (Ma)	sediment density (kg/m3)	Porosity-depth coeficient (km-1)	surface porosity	1=marine basin, 2= nonmarine basin
15.1396	15.2301	36.051	36.7	2680	0.39	0.56	2					39.5	36.7	C16n.2n
15.0986	15.1396	35.892	36.051	2680	0.39	0.56	2					130	36.051	C16n.2n	139.445		15.1396	15.2301	36.051	36.7
15.0796	15.0986	35.706	35.892	2680	0.39	0.56	2					171	35.892	C16n.ln	257.862		15.0986	15.1396	35.892	36.051
15.0591	15.0796	35.294	35.706	2680	0.39	0.56	2					190	35.706	C16n.ln	102.151		15.0796	15.0986	35.706	35.892
14.9991	15.0591	34.999	35.294	2680	0.39	0.56	2					210.5	35.294	15n	49.7573		15.0591	15.0796	35.294	35.706
14.6691	14.9991	33.705	34.999	2680	0.51	0.63	2					270.5	34.999	15n	203.39		14.9991	15.0591	34.999	35.294
14.4936	14.6691	33.157	33.705	2680	0.51	0.63	2					600.5	33.705	13n	255.023		14.6691	14.9991	33.705	34.999
13.5896	14.4936	31.034	33.157	2680	0.51	0.63	2					776	33.157	13n	320.255		14.4936	14.6691	33.157	33.705
13.3598	13.5896	30.591	31.034	2680	0.51	0.63	2					1680	31.034	12n	425.813		13.5896	14.4936	31.034	33.157
13.0307	13.3598	29.97	30.591	2680	0.51	0.63	2					1909.8	30.591	12n	518.736		13.3598	13.5896	30.591	31.034
12.7571	13.0307	29.527	29.97	2680	0.39	0.56	2					2238.9	29.97	11n	529.952		13.0307	13.3598	29.97	30.591
12.7014	12.7571	29.477	29.527	2680	0.39	0.56	2					2512.45	29.527	11n	617.494		12.7571	13.0307	29.527	29.97
12.4997	12.7014	29.183	29.477	2680	0.27	0.49	2					2568.2	29.477	11n	1115		12.7014	12.7571	29.477	29.527
11.9481	12.4997	28.278	29.183	2680	0.27	0.49	2					2769.9	29.183	11n	686.054		12.4997	12.7014	25.987	29.477
10.6081	10.7524	25.099	25.987	2680	0.27	0.49	2					4517.15	25.987	8n	315.411		10.7524	12.4997	25.987	25.987
10.5651	10.6081	24.984	25.099	2680	0.27	0.49	2					4661.45	25.099	8n	162.5		10.6081	10.7524	25.099	25.987
10.3838	10.5651	24.761	24.984	2680	0.27	0.49	2					4704.45	24.984	7An	373.913		10.5651	10.6081	24.984	25.099
10.2502	10.3838	24.474	24.761	2680	0.27	0.49	2					4885.8	24.761	7An	813.229		10.3838	10.5651	24.761	24.984
10.0715	10.2502	23.962	24.474	2680	0.27	0.49	2					5019.4	24.474	7n	465.505		10.2502	10.3838	24.474	24.761
9.76215	10.0715	23.295	23.962	2680	0.27	0.49	2					5198.05	23.962	7n	348.926		10.0715	10.2502	23.962	24.474
9.7229	9.76215	23.233	23.295	2680	0.27	0.49	2					5507.45	23.295	C6Cn.3n	463.868		9.76215	10.0715	23.295	23.962
9.64395	9.7229	23.03	23.233	2680	0.27	0.49	2					5546.7	23.233	C6Cn.3n	633.065		9.7229	9.76215	23.233	23.295
9.5953	9.64395	22.902	23.03	2680	0.27	0.49	2					5625.65	23.03	C6Cn.2n	388.916		9.64395	9.7229	23.03	23.233
9.5665	9.5953	22.754	22.902	2680	0.27	0.49	2					5674.3	22.902	C6Cn.2n	380.078		9.5953	9.64395	22.902	23.03
9.5065	9.5665	22.564	22.754	2680	0.27	0.49	2					5703.1	22.754	C6Cnln	194.595		9.5665	9.5953	22.754	22.902
9.4268	9.5065	22.268	22.564	2680	0.27	0.49	2					5763.1	22.564	C6Cnln	315.789		9.5065	9.5665	22.564	22.754
9.24265	9.4268	21.767	22.268	2680	0.27	0.49	2					5842.8	22.268	6Bn	269.257		9.4268	9.5065	22.268	22.564
8.80005	9.24265	20.709	21.767	2680	0.27	0.49	2					6026.95	21.767	6Bn	367.565		9.24265	9.4268	21.767	22.268
8.5842	8.80005	20.439	20.709	2680	0.27	0.49	2					6469.55	20.709	C6An.2n	418.336		8.80005	9.24265	20.709	21.767
8.4528	8.5842	20.213	20.439	2680	0.27	0.49	2					6685.4	20.439	C6An.2n	799.444		8.5842	8.80005	20.439	20.709
8.3774	8.4528	20.04	20.213	2680	0.27	0.49	2					6816.8	20.213	C6An.ln	581.416		8.4528	8.5842	20.213	20.439
8.22695	8.3774	19.722	20.04	2680	0.27	0.49	2					6892.2	20.04	C6An.ln	435.838		8.3774	8.4528	20.04	20.213
7.9192	8.22695	18.748	19.722	2680	0.27	0.49	2					7042.65	19.722	6n	473.113		8.22695	8.3774	19.722	20.04
6.1	7.9192	14.2	18.748	2680	0.27	0.49	2					7350.4	18.748	6n	315.965		7.9192	8.22695	18.748	19.722
3.6	6.1	11.5	14.2	2680	0.27	0.49	2										6.1	7.9192	14.2	18.748
2.3	3.6	10.4	11.5	2680	0.27	0.49	2										3.6	6.1	11.5	14.2
1	2.3	9	10.4	2680	0.27	0.49	2										2.3	3.6	10.4	11.5
0	1	5.3	9	2680	0.27	0.49	2										1	2.3	9	10.4
																	0	1	5.3	9

## Sheet: Chuq-ouput_w_Garzione_Roperch
'Age Ma'	'Compacted Thickness (km)'	'Decompacted Thickness (km)'	'Tectonic subsidence (km)'			Incremental subsidence rate
-36.7	0	0	0
-36.051	0.0905	0.196071	0.122684			0.189036										0.21382
-35.892	0.1315	0.279685	0.173052			0.316783										0.18049
-35.706	0.1505	0.317508	0.195469			0.120521										0.11159
-35.294	0.171	0.357713	0.219052			0.0572405										0.0314669
-34.999	0.231	0.472116	0.284806			0.222892
-33.705	0.561	1.08309	0.627868			0.265118
-33.157	0.7365	1.35526	0.757563			0.23667
-31.034	1.6405	2.54816	1.21667			0.216253
-30.591	1.8703	2.82198	1.30398			0.197096
-29.97	2.1994	3.20248	1.41742			0.18267
-29.527	2.47295	3.48194	1.47554			0.131189
-29.477	2.5287	3.54161	1.4901			0.291328
-29.183	2.7304	3.73566	1.52302			0.111979
-25.987	4.47765	5.65289	2.05168			0.165411
-25.099	4.62195	5.81282	2.09764			0.0517573
-24.984	4.66495	5.86038	2.11125			0.118373
-24.761	4.8463	6.06034	2.1682			0.255405
-24.474	4.9799	6.20702	2.20966			0.144456
-23.962	5.15855	6.40227	2.2644			0.106913
-23.295	5.46795	6.73791	2.35724			0.139187
-23.233	5.5072	6.78026	2.36884			0.18704
-23.03	5.58615	6.86528	2.39204			0.114296
-22.902	5.6348	6.91756	2.40626			0.111055
-22.754	5.6636	6.94848	2.41464			0.0566591
-22.564	5.7236	7.01278	2.43204			0.0915758
-22.268	5.8033	7.09801	2.45501			0.0775854
-21.767	5.98745	7.2941	2.50743			0.104641
-20.709	6.43005	7.76056	2.62987			0.115729
-20.439	6.6459	7.98558	2.68782			0.214612
-20.213	6.7773	8.12178	2.72254			0.153657
-20.04	6.8527	8.19966	2.74229			0.114123
-19.722	7.00315	8.35448	2.78129			0.122647
-18.748	7.3109	8.66875	2.85948			0.0802791
-14.2	9.1301	10.4592	3.28275			0.0930668
-11.5	11.6301	12.7061	3.77294			0.181555
-10.4	12.9301	13.7429	3.9885			0.195961
-9	14.2301	14.6503	4.17318
-5.3	15.2301	15.2301	4.28961

## Sheet: Ayaviri - input Perez & Levine
Interval top depth (km)	Interval bottom depth (km)	Interval top age (Ma)	Interval Bottom age (Ma)	sediment density (kg/m3)	Porosity-depth coeficient (km-1)	surface porosity	1=marine basin, 2= nonmarine basin
6.063	6.561	36.6	36.9	2600	0.27	0.49	2
5.658	6.063	35.2	36.6	2600	0.27	0.49	2
4.944	5.658	30	35.2	2600	0.27	0.49	2
4.821	4.944	29.3	30	2600	0.3	0.5	2
4.116	4.821	29.3	29.3	2600	0.3	0.5	2
3.455	4.116	28.6	29.3	2600	0.27	0.49	2
3.414	3.455	28.6	28.6	2600	0.27	0.49	2
2.58	3.414	28.2	28.6	2600	0.27	0.49	2
2.337	2.58	27.6	28.2	2550	0.39	0.56	2
2.298	2.337	27.1	27.6	2600	0.27	0.39	2
1.959	2.298	26.4	27.1	2550	0.39	0.56	2
1.912	1.959	23.5	26.4	2500	0.51	0.63	2
1.756	1.912	23.2	23.5	2600	0.27	0.49	2
1.394	1.756	22.7	23.2	2600	0.27	0.49	2
1.179	1.394	16.9	22.7	2550	0.39	0.56	2
1.051	1.179	15.7	16.9	2600	0.3	0.5	2
0.06	1.051	9.1	15.7	2500	0.59	0.58	2
0	0.06	3.9	9.1	2500	0.59	0.58	2

## Sheet: Ayaviri ouput - Perez & Levine
'Age	Ma'	'Compacted	Thickness	(km)'	'Decompacted	Thickness	(km)'	'Tectonic	subsidence	(km)'
-36.9	0	0	0
-36.6	0.498	0.810122	0.452759
-35.2	0.903	1.38346	0.739149
-30	1.617	2.28308	1.14221
-29.3	1.74	2.43228	1.2057
-29.3	2.445	3.22608	1.51686
-28.6	3.106	3.8845	1.74644
-28.6	3.147	3.92396	1.75986
-28.2	3.981	4.6892	2.01167
-27.6	4.224	4.93363	2.10864
-27.1	4.263	4.9612	2.1119
-26.4	4.602	5.26821	2.22096
-23.5	4.649	5.3169	2.2424
-23.2	4.805	5.42466	2.26396
-22.7	5.167	5.67794	2.32341
-16.9	5.382	5.84645	2.38213
-15.7	5.51	5.93091	2.40183
-9.1	6.501	6.53579	2.5742
-3.9	6.561	6.561	2.57986

## Sheet: Cusco - input Sundell et al
Interval top depth (km)	Interval bottom depth (km)	Interval top age (Ma)	Interval Bottom age (Ma)	sediment density (kg/m3)	Porosity-depth coeficient (km-1)	surface porosity	1=marine basin, 2= nonmarine basin
5.6	5.95	41.1	57.9	2680	0.39	0.56	2
4.38	5.6	36.5	41.1	2600	0.39	0.56	2
2.75	4.38	27.4	36.5	2600	0.39	0.56	2
1.41	2.75	23.1	27.4	2600	0.27	0.49	2
1.31	1.41	10.1	23.1	2600	0.27	0.49	2
0.11	1.31	7.4	10.1	2600	0.27	0.49	2
5.6	5.95
4.38	5.6
2.75	4.38
1.41	2.75
1.31	1.41
0.11	1.31

## Sheet: Cusco- ouput Sundell et al
'Age Ma'	'Compacted Thickness (km)'	'Decompacted Thickness (km)'	'Tectonic subsidence (km)'			Incremental subsidence rate
-57.9	0	0.11	0.11
-41.1	0.35	0.761589	0.494099			0.022863
-36.5	1.57	2.41158	1.26049			0.166606
-27.4	3.2	4.09175	1.83852			0.0635196
-23.1	4.54	5.12621	2.11385			0.0640323
-10.1	4.64	5.1999	2.1355			0.00166497
-7.4	5.95	5.99651	2.37078			0.0871421

## Sheet: Arizaro - input DeCelles et al
Interval top depth (km)	Interval bottom depth (km)	Interval top age (Ma)	Interval Bottom age (Ma)	sediment density (kg/m3)	Porosity-depth coeficient (km-1)	surface porosity	1=marine basin, 2= nonmarine basin
3.372	3.445	18.8	20.6	2680	0.39	0.56	2
3.299	3.372	17.9	18.8	2680	0.39	0.56	2
0.81	3.299	15.7	17.9	2720	0.51	0.63	2
0.41	0.81	14.2	15.7	2720	0.51	0.63	2
0.09	0.41	13.8	14.2	2720	0.51	0.63	2
0	0.09	8.4	13.8	2720	0.51	0.63	2

## Sheet: Arizaro - output DeCelles et al
'Age	'Compacted	'Decompacted	'Tectonic	subsidence	(km)'
-20.6	0	0	0
-18.8	0.073	0.136759	0.0862608
-17.9	0.146	0.265075	0.164333
-15.7	2.635	2.99869	1.33074
-14.2	3.035	3.24532	1.40012
-13.8	3.355	3.40618	1.44365
-8.4	3.445	3.445	1.45397
